# Supplementary material
Source: Springer Nature journal article supplement (https://www.springermedizin.de/resource/supplementary/12885_2013_5259_MOESM3_ESM.pdf/9465254)

MiaPaCa-2

PANC-1

Sirt1

Actin

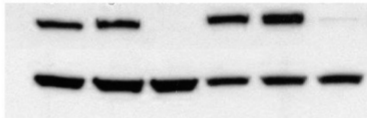

Untreated

Mock control

Sirt1 siRNA

Untreated

Mock control

Sirt1 siRNA

Supplement: MOESM3 [file 9465254]
